# Supplementary material
Source: MDPI journal article supplement (https://www.mdpi.com/2073-4352/10/9/841)
Supplement: s1 [file s1]

# Supplementary Materials

## Gas-Dependent Reversible Structural and Magnetic Transformation between Two Ladder Compounds

Jun Manabe <sup>1</sup>, Kazuki Nishida <sup>1</sup>, Xiao Zhang <sup>1</sup>, Yuki Nakano <sup>1</sup>, Masaru Fujibayashi <sup>1,2</sup>, Goulven Cosquer <sup>1,2</sup>, Katsuya Inoue <sup>1,2,3</sup>, Seiya Shimono <sup>4</sup>, Hiroki Ishibashi <sup>5</sup>, Yoshiki Kubota <sup>5</sup>, Misaki Shiga <sup>6</sup>, Ryo Tsunashima <sup>6</sup>, Yoko Tatewaki <sup>7</sup>, and Sadafumi Nishihara <sup>1,2,3,8,\*</sup>

<sup>1</sup> Department of Chemistry, Graduate School of Science, Hiroshima University, 1-3-1, Kagamiyama, Higashi-hiroshima, 739-8526, Japan

<sup>2</sup> Graduate School of Advanced Science and Engineering, Hiroshima University, 1-3-1, Kagamiyama, Higashi-hiroshima, 739-8526, Japan

<sup>3</sup> Chirality Research Center & Institute for Advanced Materials Research, Hiroshima University, 1-3-1, Kagamiyama, Higashi-hiroshima, 739-8526, Japan

<sup>4</sup> Department of Materials Science and Engineering, National Defense Academy, 1-10-20 Hashirimizu, Yokosuka, Kanagawa, 239-8686, Japan

<sup>5</sup> Department of Physical Science, Graduate School of Science, Osaka Prefecture University, Sakai, Osaka, 599-8531, Japan

<sup>6</sup> Graduate School of Sciences and Technology for Innovation, Yamaguchi University, Yoshida, 1677-1, Yamaguchi, 753-8512, Japan

<sup>7</sup> Department of Applied Chemistry, Graduate School of Engineering, Tokyo University of Agriculture and Technology, 2-24-16, Nakacho, Koganei, 184-8588, Japan

<sup>8</sup> JST, PRESTO, 4-1-8, Honcho, Kawaguchi, Saitama, 332-0012, Japan

\* Correspondence: snishi@hiroshima-u.ac.jp (S.N.)

### Table of contents

|                                                                                          |    |
|------------------------------------------------------------------------------------------|----|
| 1. Experimental setup and schematic diagram                                              | S2 |
| 2. Temperature-dependent magnetization of <b>1</b>                                       | S2 |
| 3. Temperature-dependent heat capacity of <b>1</b> under variable DC magnetic fields     | S3 |
| 4. Temperature-dependent magnetic susceptibility of <b>1</b> and <b>1</b> exposed to air | S3 |
| 5. TG and GC-MS analysis                                                                 | S4 |
| 6. IR spectra                                                                            | S4 |
| 7. PXRD patterns of <b>1'</b> and <b>2'</b>                                              | S5 |

## 1. Experimental setup and schematic diagram

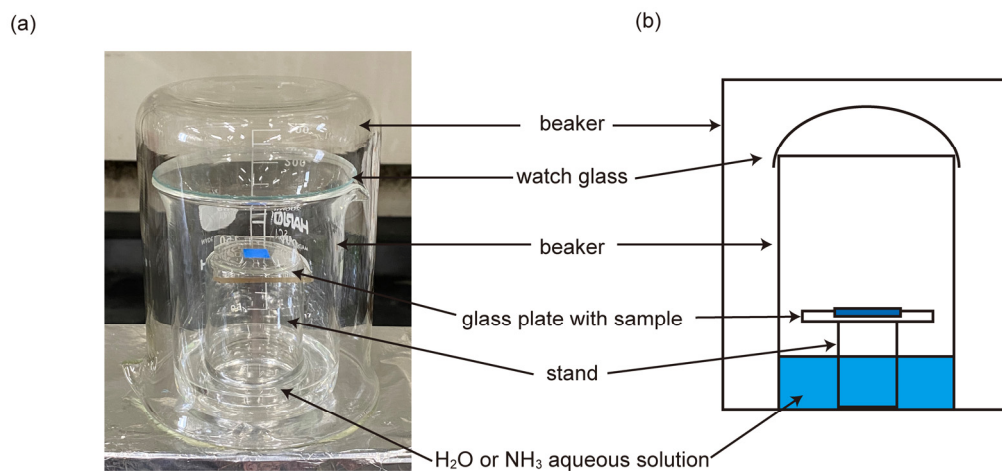

Figure S1. (a) Photo and (b) schematic diagram of the experimental setup for preparing the gaseous vapors.

## 2. Temperature-dependent magnetization of **1**

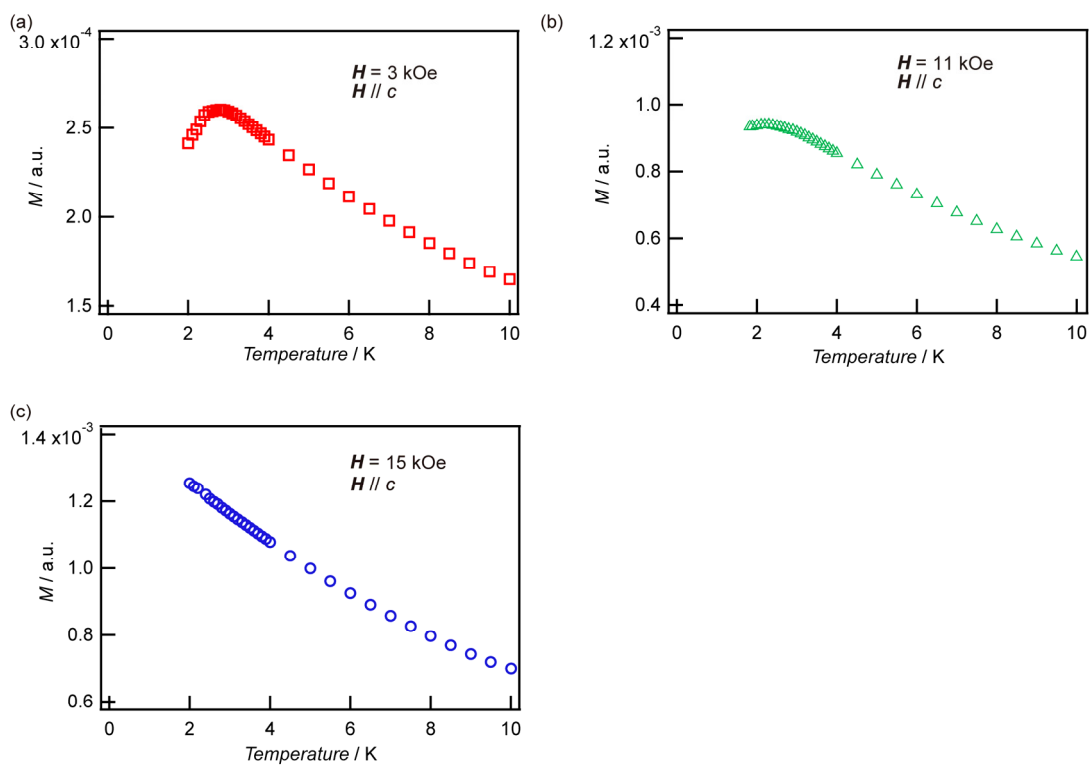

Figure S2. Temperature-dependent magnetization of **1** in fields of (a) 3 kOe, (b) 11 kOe, and (c) 15 kOe applied parallel to the  $c$ -axis.

### 3. Temperature-dependent heat capacity of **1** under variable DC magnetic fields

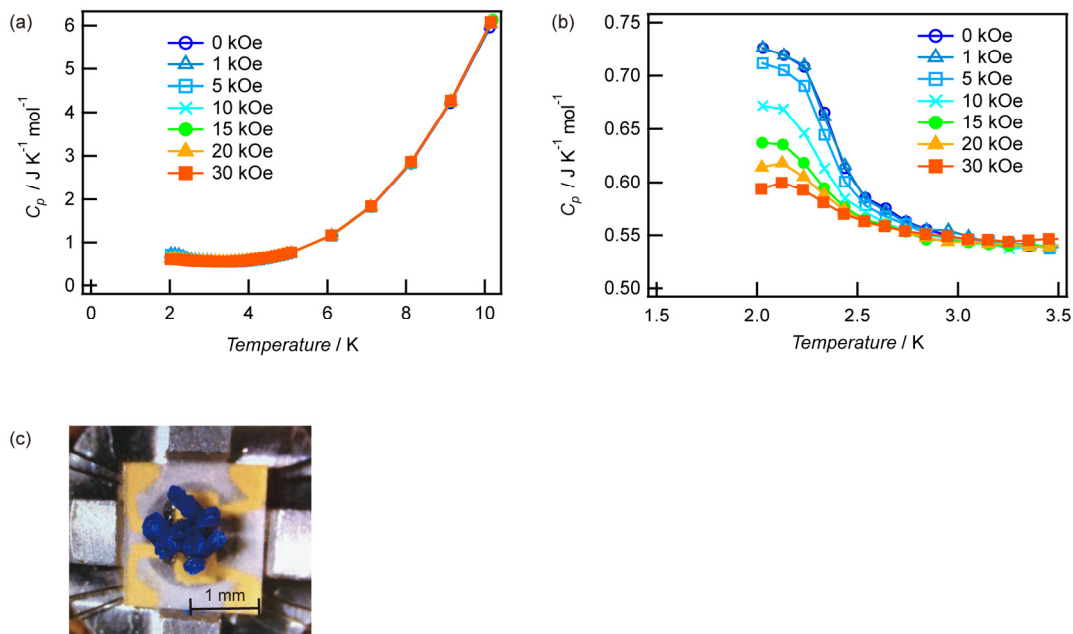

Figure S3. (a) Temperature-dependent heat capacity of **1** under magnetic fields of 0-30 kOe applied parallel to the *c*-axis. (b) An enlarged section of (a) showing data from 1.5 to 3.5 K. (c) Sample setup for the measurements. The solid lines are guides for the eye.

### 4. Temperature-dependent magnetic susceptibility of **1** and **1** exposed to air

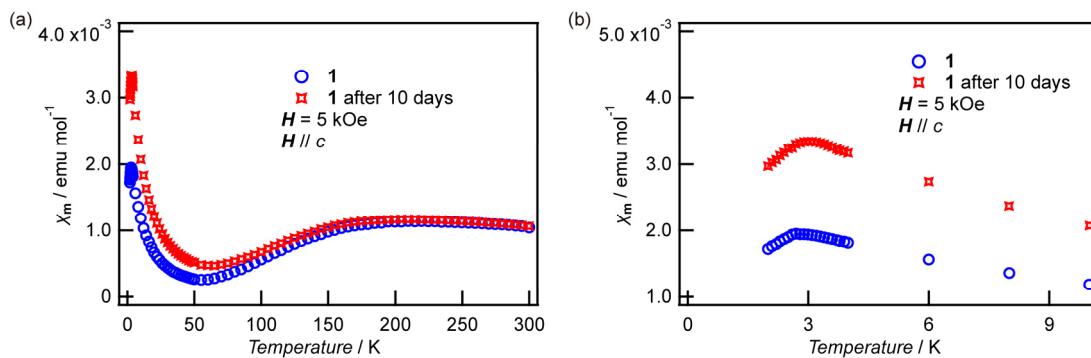

Figure S4. (a) Temperature-dependent molar magnetic susceptibility of **1** (blue) and **1** exposed to air for 10 days (red). (b) An enlarged section of the data in (a) in the low-temperature range.

## 5. TG and GC-MS analysis

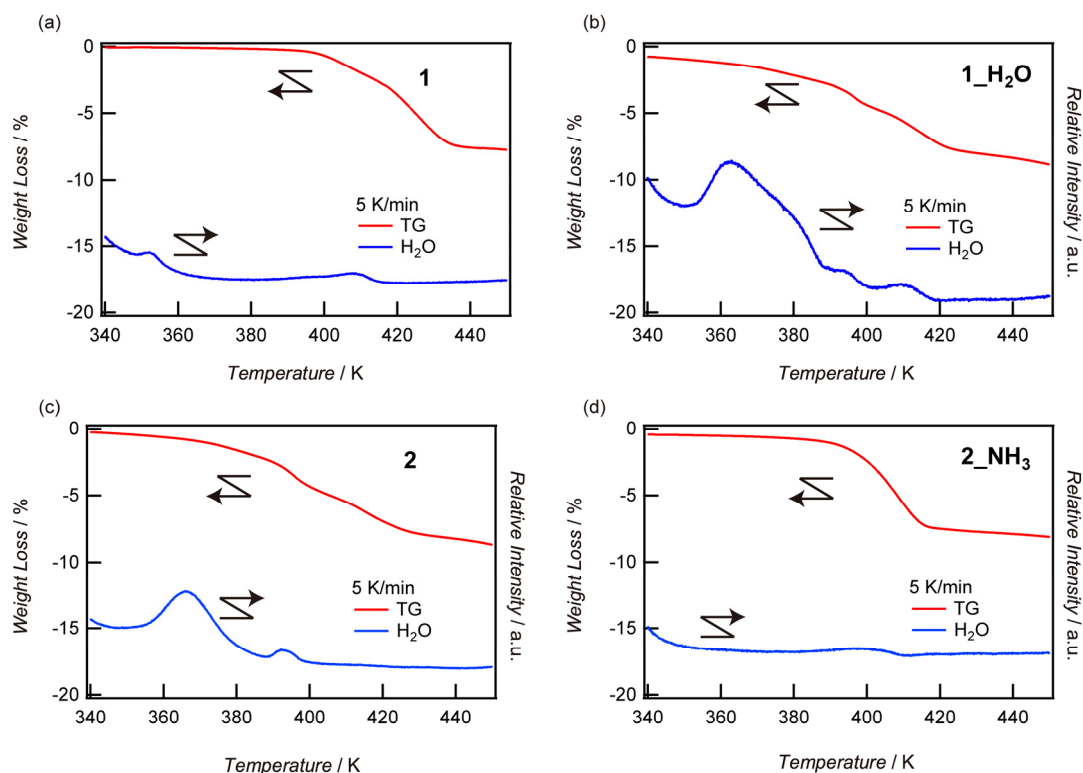

Figure S5. TG and GC-MS plots of (a) **1**, (b) **1\_H<sub>2</sub>O** (**1** exposed to H<sub>2</sub>O vapor for 4.5 h), (c) **2**, and (d) **2\_NH<sub>3</sub>** (**2** exposed to NH<sub>3</sub> vapor for 2 h). Red and blue lines show weight loss and MS intensity corresponding to H<sub>2</sub>O ( $m/z = 18$ ), respectively.

## 6. IR spectra

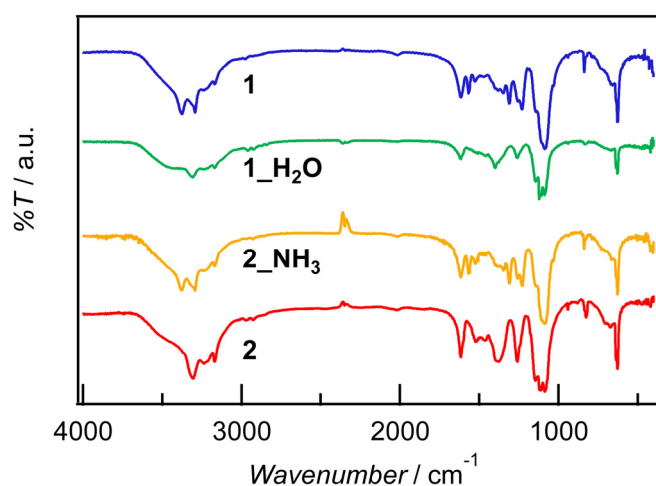

Figure S6. IR spectra of **1** (blue), **1\_H<sub>2</sub>O** (**1** exposed to H<sub>2</sub>O vapor for 4.5 h; green), **2\_NH<sub>3</sub>** (**2** exposed to NH<sub>3</sub> vapor for 2 h; yellow), and **2** (red).

## 7. PXRD patterns of 1' and 2'

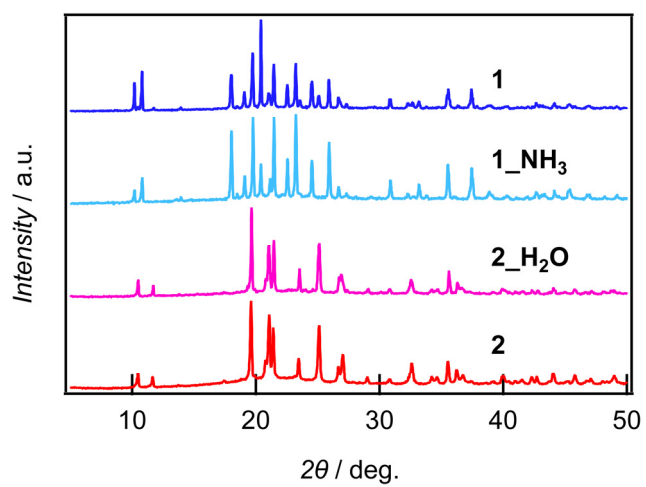

Figure S7. PXRD patterns of **1** (blue), **1'** (**1** exposed to NH<sub>3</sub> vapor for 2 h; light-blue), **2'** (**2** exposed to H<sub>2</sub>O vapor for 4.5 h; pink), and **2** (red).
